# Supplementary material
Source: ML conference proceedings conference paper supplement (https://proceedings.neurips.cc/paper_files/paper/2007/hash/32b30a250abd6331e03a2a1f16466346-Abstract.html)
Supplement: Supplementary file [file 32b30a250abd6331e03a2a1f16466346-Supplemental.zip]

# Structured Learning with Approximate Inference

Alex Kulesza and Fernando Pereira, University of Pennsylvania [M43]

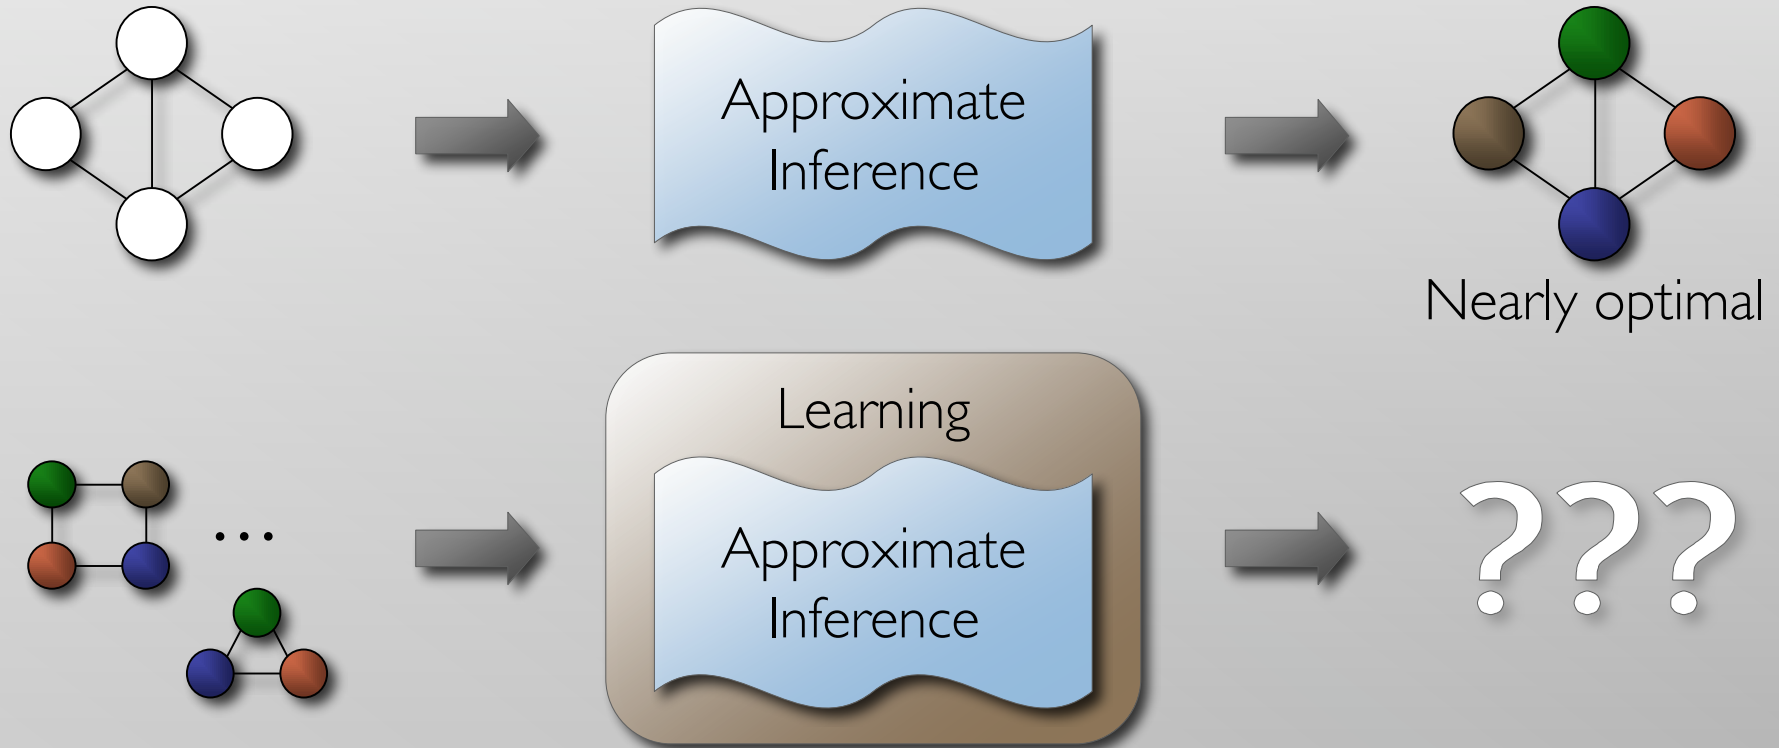

- We show that inference approximations (like LPs or loopy BP) can
  - Dramatically increase learning bias
  - Badly mislead standard learning algorithms
- For inference used in learning, **compatibility** is as important as **quality** of approximation
